# Supplementary material
Source: PubMed Central journal article supplement (PMC3187384)
Supplement: supp_193_19_5393__1.pdf [file supp_193_19_5393__1.pdf]

1 **Supplementary Materials**

2

3

4 **Characterisation of a Glucosamine/Glucosaminide**

5 ***N*-Acetyltransferase of *Clostridium acetobutylicum***

6 Jan Reith and Christoph Mayer\*

7

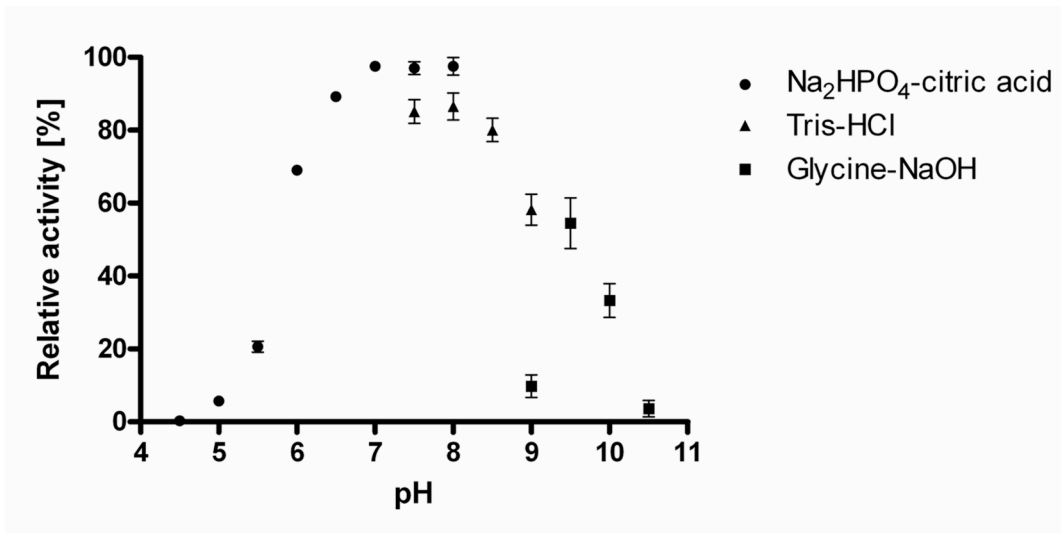

1  
 2 **Fig. S1.** The pH-activity profile of GlmA for the acetylation of GlcN with AcCoA. The enzyme  
 3 activity was quantified by using radioactively labeled [acetyl-1-<sup>14</sup>C]-CoA in the indicated buffers  
 4 at a pH ranging from 4.5 to 10.5 (for details see Materials and Methods). Data are mean ± SE (n  
 5 = 4).

6

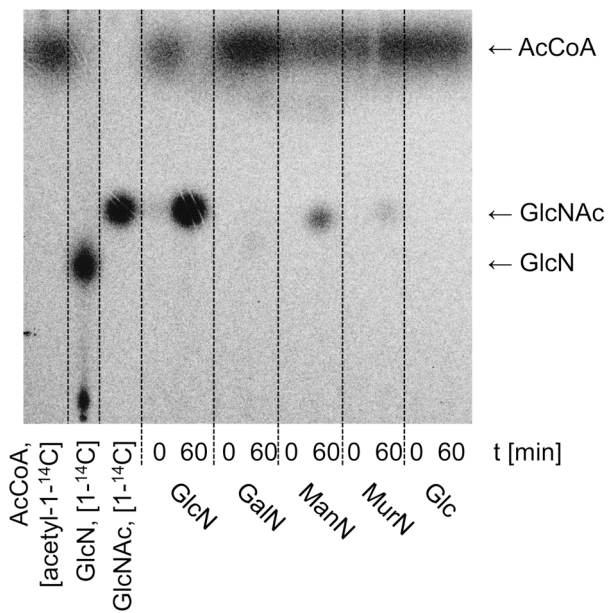

8  
 9 **Fig. S2.** GlcN is the preferred substrate of GlmA. An Acetylation of GalN and glucose (Glc)  
 10 were observed in the assay using radioactively labeled [Acetyl-1-<sup>14</sup>C]-CoA. The low amount of  
 11 conversion with ManN and MurN may be due to GlcN contaminations in the chemicals since in

1 both cases a spot that runs like GlcNAc was detected and ManNAc as well as MurNAc would run  
 2 different from that on TLC.

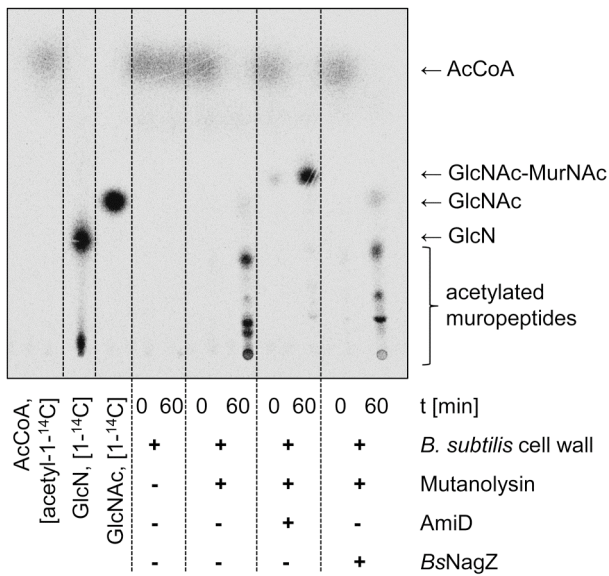

3  
 4 **Fig. S3.** Cell wall prepared from *B. subtilis* was degraded with the purified autolysins  
 5 mutanolysin, AmiD and/or *BsNagZ*. Terminal non-reducing GlcN residues of mutanolysin  
 6 formed muropeptides had to be firstly acetylated by GlmA before the *N*-acetylglucosaminidase  
 7 *BsNagZ* is able to cleave it (compare with Fig. 7). Here, *BsNagZ* was not added subsequently to  
 8 the reaction mixture containing GlmA.

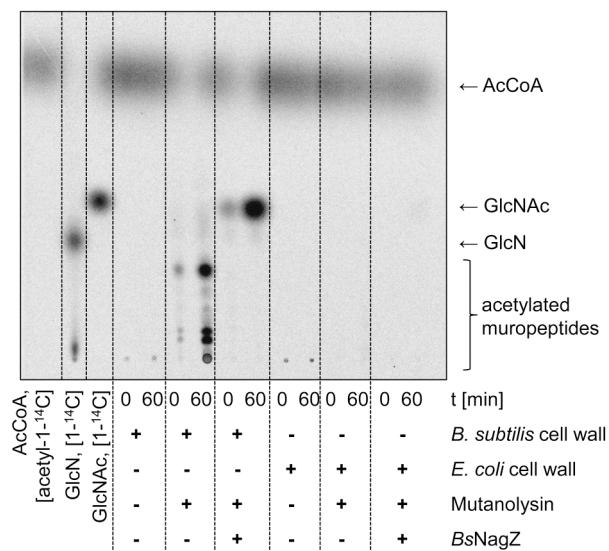

10  
 11 **Fig. S4.** Peptidoglycan fragments of *B. subtilis* containing deacetylated GlcN residues are a  
 12 substrate for GlmA but not such fragments of *E. coli* that lack this modification. Radioactive

1 acetylation with GlmA using [acetyl-1-<sup>14</sup>C]-CoA was conducted with cell wall preparations from  
2 *B. subtilis* and *E. coli* that were previously degraded with mutanolysin and/or *BsNagZ*.

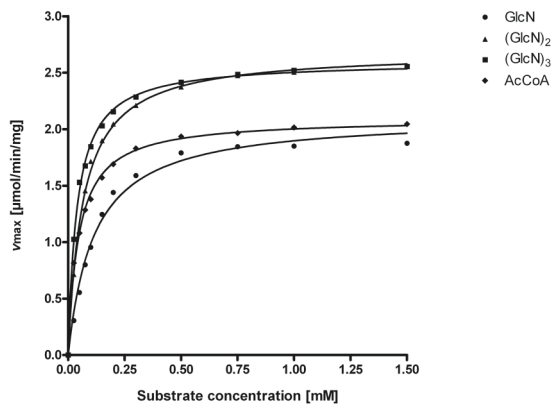

3  
4 **Fig. S5.** Kinetics for GlmA with GlcN, chitobiose and chitotriose. The kinetic values of GlmA  
5 were determined by nonlinear regression. GlmA revealed a slightly lower  $v_{\max}$  value for GlcN  
6 compared to the chitosans (GlcN)<sub>2</sub> and (GlcN)<sub>3</sub>. The calculated  $K_m$  value of GlcN was about two  
7 to three fold higher than for chitosans consisting of more than one GlcN residue (cf. table 1).  
8 Data are mean of two independent experiments. Standard errors were below 5%.

9
